# Supplementary material for: Activation of Blood Vessel Development in Endometrial Stromal Cells In Vitro Cocultured with Human Peri-Implantation Embryos Revealed by Single-Cell RNA-Seq
Source: MDPI journal article supplement (doi:10.3390/life11050367), 2021-04-21
Supplement: s1 [file s1]

## Supplementary materials:

# Activation of Blood Vessel Development in Endometrial Stromal Cells In Vitro Cocultured with Human Peri-Implantation Embryos Revealed by Single-Cell RNA-Seq

Bo Lv <sup>†</sup>, Xiaoyu Xu <sup>†</sup>, Xunyi Zhang <sup>†</sup>, Lingbin Qi, Wen He, Lu Wang, Xian Chen, Luying Peng, Jinfeng Xue <sup>\*</sup>, Yazhong Ji <sup>\*</sup> and Zhigang Xue <sup>\*</sup>

**Table S1.** Summary of number of individual EmSCs and DEGs between PRE and POST group.

| EmSCs & Gene Number | Pre | Post | Total |
|---------------------|-----|------|-------|
| Cell Number         | 24  | 57   | 81    |
| DEG * (Log2FC>1)    | 569 | 1783 | 2352  |

\* The number of DEG in this table represented the number of upregulated genes (FDR <0.05) in the individual groups.

**Table S2.** The list of gene sets used in Figure 3E ( "blood vessel development") and Figure S2 ( "female pregnancy" and "angiogenesis").Pathways

|                          | Genes                                                                                                                                                                                                                                                                                                                                                                                     |
|--------------------------|-------------------------------------------------------------------------------------------------------------------------------------------------------------------------------------------------------------------------------------------------------------------------------------------------------------------------------------------------------------------------------------------|
| blood vessel development | AAMP, ACVR2B, ANPEP, ATP2B4, BMP4, COL1A1, COL1A2, COL3A1, COL15A1, EPAS1, FAP, GATA6, NR4A1, HPGD, IL1A, CXCL8, LOX, LRP1, LTBP1, MMP14, NFATC4, ENPP2, PGF, PLCG1, PRKD1, PTGIS, PTGS2, SFRP1, TGFB1, THBS2, TNFAIP3, WNT11, RECK, ALDH1A2, HGS, CUL7, RAMP1, HEY1, ADGRA2, DLL1, EPN1, SUFU, SPHK2, TBX20, RHOJ, E2F8, COL18A1, RSPO3, CREB3L1, HSPB6, UNC5B, THSD7A, MIR199A2, MIR503 |
| female pregnancy         | ADRA2C, AR, BCL2, ESR1, GJA1, HPGD, HSD11B2, LIF, MMP9, OVGPI, PGF, PPARD, PTGIS, PTGS2, RECK, ENDOU, SLC38A3, EPN1, SPHK2, TLE6                                                                                                                                                                                                                                                          |
| angiogenesis             | AAMP, ANPEP, ATP2B4, BMP4, COL15A1, EPAS1, FAP, GATA6, NR4A1, IL1A, CXCL8, MMP14, NFATC4, ENPP2, PGF, PLCG1, PRKD1, PTGIS, PTGS2, SFRP1, TGFB1, THBS2, TNFAIP3, RECK, HGS, RAMP1, HEY1, ADGRA2, DLL1, EPN1, TBX20, RHOJ, E2F8, COL18A1, RSPO3, CREB3L1, HSPB6, UNC5B, THSD7A, MIR199A2, MIR503                                                                                            |

**Table S3.** The list of primers used in the study.

| Genes        | Primer sequence (5' to 3') |
|--------------|----------------------------|
| <i>RAMP1</i> | AGAGGTGGACAGGTTCTTC        |
|              | CTACACAATGCCCTCAGTG        |
| <i>LTBP1</i> | CCCTAATGGTGAGTGTTTGA       |
|              | ATTCCACCAGGACAGATTTC       |
| <i>LRP1</i>  | TTCACAAAGGAGACTACAGC       |
|              | TCGATCTGATCCAGGTTACT       |

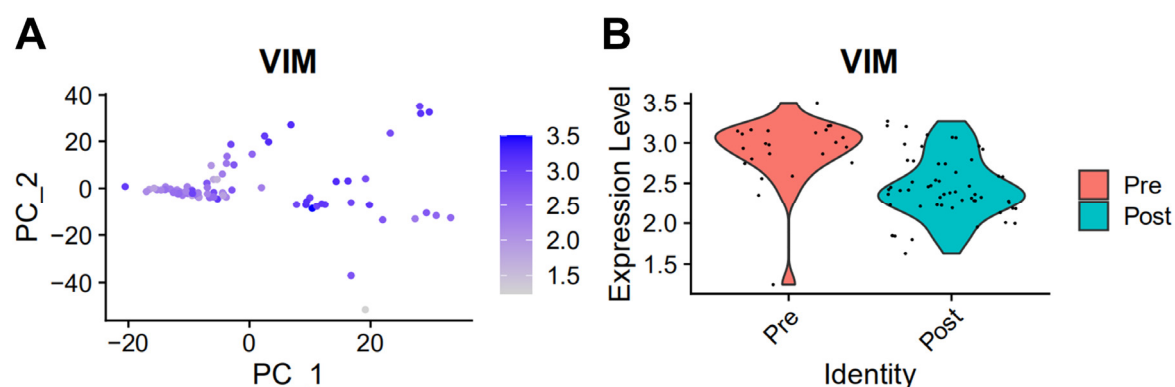

**Figure S1.** Characterization of endometrial stromal cells. Plot of vimentin (VIM) expression among all cells (A) and between the 'PRE' EmSCs and the 'POST' EmSCs (B).

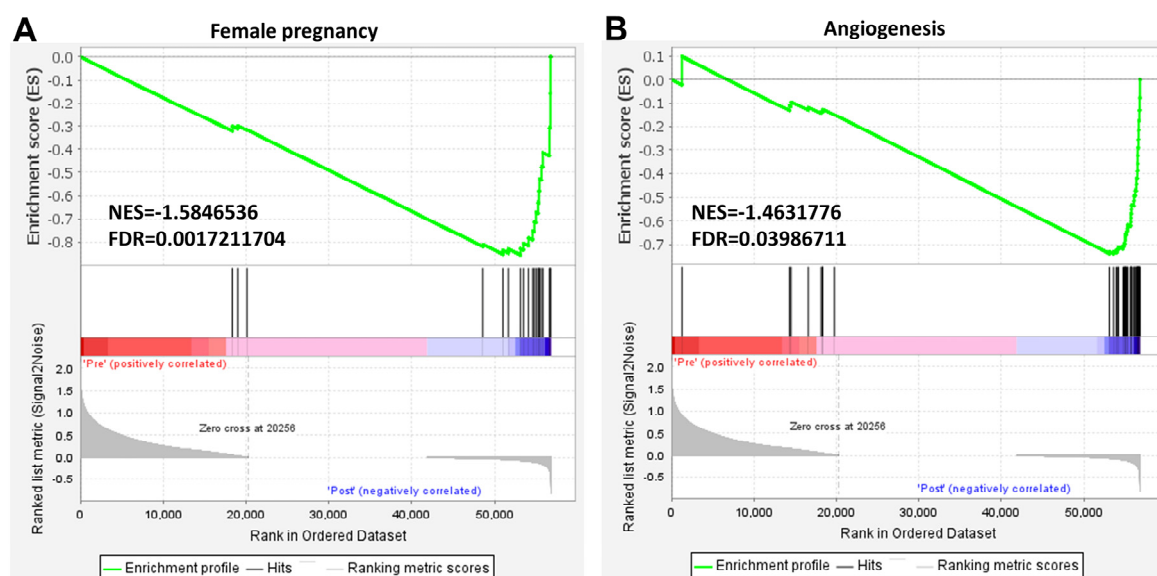

**Figure S2.** GSEA for female pregnancy gene set (A) and angiogenesis gene set (B).

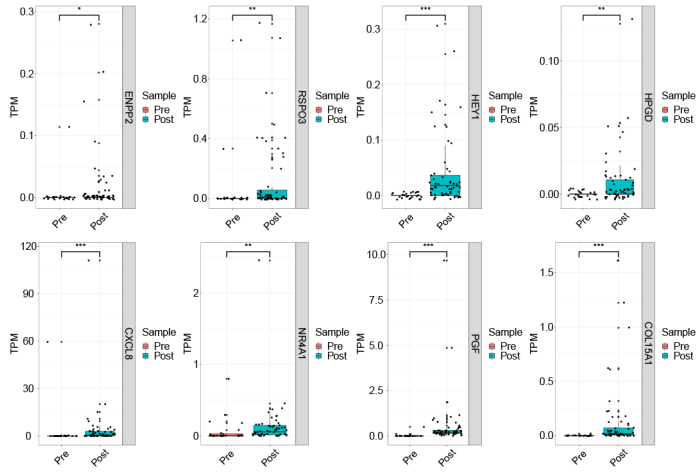

**Figure S3.** Boxplots showing other high expressed blood vessel development genes in POST EmSCs compared to PRE EmSCs using transcript per million (TPM). The asterisk means statistical significance (\* $p < 0.05$ , \*\* $p < 0.01$ , \*\*\* $p < 0.001$ ). Dots represented the value of individual cell in each group. Genes (from left to right, top to bottom): ENPP2, RSPO3, HEY1, HPGD, CXCL8, NR4A1, PGF, and COL15A1.

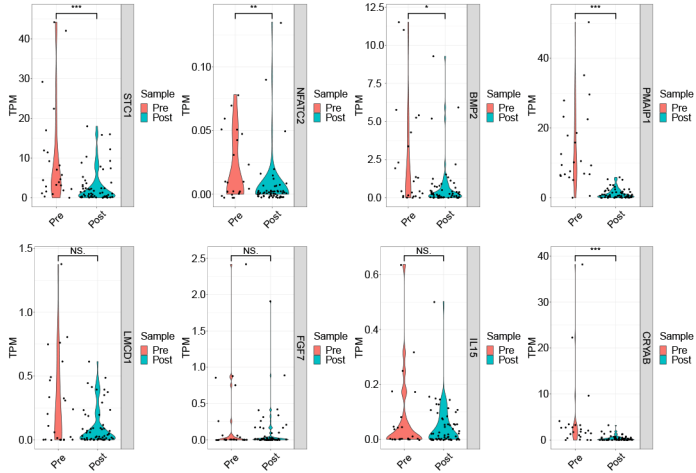

**Figure S4.** Violin plots showing endometrial phases related genes between PRE cells and POST cells using transcript per million (TPM). The asterisk means statistical significance (\* $p < 0.05$ , \*\* $p < 0.01$ , \*\*\* $p < 0.001$ ); NS indicated no significance between two groups. Dots represented the value of individual cell in each group. Proliferative stromal genes (upper panel, from left to right): STC1, NFATC2, BMP2, and PMAIP1. Secretory stromal genes (below panel, from left to right): LMCD1, FGF7, IL15, and CRYAB.
